# Supplementary material
Source: publisher figshare collection journal article supplement (https://rs.figshare.com/ndownloader/files/28529425)
Supplement: Supplementary file 1 [file 28529425]

## Sheet: Sheet1
Species	Family	Classification	Flight type	Mass (g)	Wingspan (mm)	Wing area (cm²)	Max. Wing loading (N/m²)	Overall wing darkness			UV-VIS-NIR Mean Reflectance per Wing Patch (300-2000)							VIS Mean Reflectance per Wing Patch (300-700 nm)
								VIS Reflectance 300-700 nm	VIS+NIR reflectance 300-2000	NIR reflectance 701-2000	Primary Coverts	Marginal Coverts	Secondary Coverts 1	Secondary Coverts 2	Wingtip	Primaries	Secondaries	Primary Coverts	Marginal Coverts	Secondary Coverts 1	Secondary Coverts 2	Wingtip	Primaries	Secondaries
Aethia cristatella	Alcidae	seabird, oceanic	flap	277	480	283	96.0201	9.17781	51.621	64.7564	51.621	51.621	51.621	51.621	51.621	51.621	51.621	9.17781	9.17781	9.17781	9.17781	9.17781	9.17781	9.17781
Aethia psittacula	Alcidae	seabird, oceanic	flap	282	502	334	82.8269	7.80059	46.0545	57.9137	46.0545	46.0545	46.0545	46.0545	46.0545	46.0545	46.0545	7.80059	7.80059	7.80059	7.80059	7.80059	7.80059	7.80059
Aethia pusilla	Alcidae	seabird, oceanic	flap	104	325	144	70.85	10.5841	48.5306	60.2746	48.5306	48.5306	48.5306	48.5306	48.5306	48.5306	48.5306	10.5841	10.5841	10.5841	10.5841	10.5841	10.5841	10.5841
Aethia pygmaea	Alcidae	seabird, oceanic	NA	99-136	370	191	69.8513	12.1909	47.5103	58.4467	47.5103	47.5103	47.5103	47.5103	47.5103	47.5103	47.5103	12.1909	12.1909	12.1909	12.1909	12.1909	12.1909	12.1909
Alca torda	Alcidae	seabird, oceanic	flap	620	661	462	131.649	9.6093	45.8067	57.0195	45.8067	45.8067	45.8067	45.8067	45.8067	45.8067	white	9.6093	9.6093	9.6093	9.6093	9.6093	9.6093	white
Alle alle	Alcidae	seabird, oceanic	NA	140-192	340-480	65	289.772	7.05255	43.72	55.0728	45.311	45.311	45.311	45.311	45.311	45.311	white	7.30921	7.30921	7.30921	7.30921	7.30921	7.30921	white
Anhinga anhinga	Anhingidae	seabird, also inland	NA	1240	1170	1730	70.3145	12.2804	35.9257	43.2692	31.634	31.634	72.6572	31.634	31.634	31.634	31.634	8.77224	8.77224	42.3064	8.77224	8.77224	8.77224	8.77224
Bulweria bulwerii	Procellariidae	seabird, oceanic	flap-glide	90	650	450	19.62	3.48233	29.0754	37.0145	29.0754	29.0754	29.0754	29.0754	29.0754	29.0754	29.0754	3.48233	3.48233	3.48233	3.48233	3.48233	3.48233	3.48233
Calonectris diomedea	Procellariidae	seabird, oceanic	flap-glide	946	1210	1114	83.3057	6.29617	36.158	45.4251	36.158	36.158	36.158	36.158	36.158	36.158	36.158	6.29617	6.29617	6.29617	6.29617	6.29617	6.29617	6.29617
Catharacta lonnbergi	Stercorariidae	seabird, oceanic	flap	1440	1370	2286	61.7953	10.9853	42.4312	52.2006	40.3904	40.3904	40.3904	40.3904	40.3904	65.1275	40.3904	6.77025	6.77025	6.77025	6.77025	6.77025	57.8631	6.77025
Catharacta maccormicki	Stercorariidae	seabird, oceanic	flap	1237	1340	2070	58.623	9.32491	41.6688	51.6913	41.0798	41.0798	41.0798	41.0798	41.0798	49.2633	41.0798	7.09637	7.09637	7.09637	7.09637	7.09637	38.0572	7.09637
Catharacta skua	Stercorariidae	seabird, oceanic	flap	1350	1370	2140	61.8855	9.56419	36.5019	44.8576	29.3873	37.6123	37.6123	37.6123	29.3873	54.7905	29.3873	6.06184	7.61263	7.61263	7.61263	6.06184	41.2503	6.06184
Cepphus columba	Alcidae	seabird, oceanic	flap	470	578	422	109.258	11.3243	42.6667	52.3717	40.4766	40.4766	61.6223	61.6223	40.4766	40.4766	40.4766	7.64018	7.64018	43.2107	43.2107	7.64018	7.64018	7.64018
Cepphus grylle	Alcidae		NA	450-550	520-580	NA	185.19	14.4426	47.1024	57.2327	42.2169	42.2169	59.0875	59.0875	42.2169	42.2169	42.2169	8.03797	8.03797	30.1545	30.1545	8.03797	8.03797	8.03797
Cerorhinca monocerata	Alcidae	seabird, oceanic	flap	560	615	440	124.855	10.0848	44.5924	55.2718	44.5924	44.5924	44.5924	44.5924	44.5924	44.5924	44.5924	10.0848	10.0848	10.0848	10.0848	10.0848	10.0848	10.0848
Chlidonias leucopterus	Laridae	seabird, also inland	NA	68	650	545	12.24	37.4128	54.7946	60.2368	59.894	59.6982	59.894	59.6982	28.1474	59.894	59.894	8.19571	42.7893	8.19571	42.7893	8.19571	8.19571	8.19571
Chlidonias niger	Laridae	seabird, also inland	flap	60-86	570-650	NA	16.1931	24.3151	50.2429	58.297	50.2429	50.2429	50.2429	50.2429	35.9306	50.2429	35.9306	24.3151	24.3151	24.3151	24.3151	24.3151	24.3151	24.3151
Creagrus furcatus	Laridae	seabird, oceanic	flap	690	1368	1878	36.0431	30.6639	49.6118	55.5361	66.3984	44.149	66.3984	44.149	35.543	44.149	44.149	63.0819	19.4261	63.0819	19.4261	7.58825	63.0819	63.0819
Daption capense	Procellariidae	seabird, oceanic	flap-glide	444	873	785	55.4859	25.2587	49.2681	56.7399	41.6181	41.6181	41.6181	65.1036	41.6181	65.1036	41.6181	11.3579	11.3579	11.3579	54.0334	11.3579	54.0334	11.3579
Diomedea epomophora	Diomedeidae	seabird, oceanic	glide	8697	2820	4963	171.907	6.36659	41.4139	52.2926	41.4139	white	41.4139	41.4139	41.4139	41.4139	41.4139	6.36659	white	6.36659	6.36659	6.36659	6.36659	6.36659
Diomedea exulans	Diomedeidae	seabird, oceanic	glide	8550	3010	5830	143.869	5.40935	33.5775	42.3256	33.5775	white	white	33.5775	33.5775	33.5775	33.5775	5.40935	white	white	5.40935	5.40935	5.40935	5.40935
Fratercula arctica	Alcidae	seabird, oceanic	flap	398	549	369	105.81	9.92428	48.9135	60.9914	48.9135	48.9135	48.9135	48.9135	48.9135	48.9135	48.9135	9.92428	9.92428	9.92428	9.92428	9.92428	9.92428	9.92428
Fratercula cirrhata	Alcidae	seabird, oceanic	flap	799	662	512	153.09	6.10091	42.0065	53.1327	42.0065	42.0065	42.0065	42.0065	42.0065	42.0065	42.0065	6.10091	6.10091	6.10091	6.10091	6.10091	6.10091	6.10091
Fratercula corniculata	Alcidae	seabird, oceanic	flap	663	607	434	149.862	11.0925	53.2108	66.2575	53.2108	53.2108	53.2108	53.2108	53.2108	53.2108	53.2108	11.0925	11.0925	11.0925	11.0925	11.0925	11.0925	11.0925
Fregetta grallaria	Hydrobatidae	seabird, oceanic	glide-flap	45	447	283	15.5989	7.62729	31.1825	38.4785	24.9476	38.3409	38.3409	38.3409	24.9476	24.9476	24.9476	5.97685	9.52215	9.52215	9.52215	5.97685	5.97685	5.97685
Fregetta tropica	Hydrobatidae	seabird, oceanic	glide-flap	54	410	226	23.4398	7.35661	29.0248	35.7326	28.2265	34.558	34.558	34.558	28.2265	28.2265	28.2265	7.20536	8.40494	8.40494	8.40494	7.20536	7.20536	7.20536
Fulmarus glacialis	Procellariidae	seabird, oceanic	flap-glide	693	1035	1095	62.0852	16.2382	46.8395	56.3377	43.4314	55.1055	55.1055	55.1055	43.4314	43.4314	43.4314	13.4681	22.9569	22.9569	22.9569	13.4681	13.4681	13.4681
Garrodia nereis	Hydrobatidae	seabird, oceanic	NA	32	320	140	22.4229	7.67017	34.8793	43.3182	35.2836	32.2349	32.2349	32.2349	35.2836	35.2836	35.2836	7.69358	7.51706	7.51706	7.51706	7.69358	7.69358	7.69358
Gygis alba	Laridae	seabird, oceanic	flap	95	725	522	17.8534	52.6014	66.5329	70.8996	66.5329	66.5329	66.5329	66.5329	66.5329	66.5329	66.5329	52.6014	52.6014	52.6014	52.6014	52.6014	52.6014	52.6014
Halocyptena microsoma	Hydrobatidae	seabird, oceanic	NA	20	320-360	137	14.3212	8.70326	34.3313	42.2715	34.4851	33.0912	33.0912	33.0912	34.4851	34.4851	34.4851	9.17793	4.87617	4.87617	4.87617	9.17793	9.17793	9.17793
Hydrobates pelagicus	Hydrobatidae	seabird, oceanic	NA	28	340	153	17.9529	8.12124	25.3108	30.6274	23.9142	26.5921	26.5921	26.5921	23.9142	23.9142	23.9142	7.21154	5.56698	5.56698	5.56698	7.21154	7.21154	7.21154
Larosterna inca	Laridae	seabird, oceanic	flap	219	870	765	28.0835	10.5343	34.4548	41.8861	33.1704	33.1704	33.1704	33.1704	33.1704	33.1704	58.2892	8.63752	8.63752	8.63752	8.63752	8.63752	8.63752	45.7345
Larus argentatus	Laridae	seabird, also inland	flap	1102	1486	2284	47.332	29.858	48.92	54.8921	50.6729	50.6729	50.6729	50.6729	32.8402	50.6729	55.7363	30.6517	30.6517	30.6517	30.6517	7.58229	30.6517	45.3102
Larus atricilla	Laridae	seabird, also inland	flap	325	1030	1060	30.0778	18.1885	42.3856	49.9154	41.4484	41.4484	41.4484	41.4484	30.2434	41.4484	70.5173	15.4963	15.4963	15.4963	15.4963	5.57175	15.4963	60.0235
Larus californicus	Laridae	seabird, also inland	flap	560	1210	1478	37.1691	23.0016	45.9535	53.1041	47.2048	47.2048	47.2048	47.2048	27.8244	47.2048	64.0373	22.8685	22.8685	22.8685	22.8685	5.54157	22.8685	52.6634
Larus canus	Laridae	seabird, also inland	NA	380	1200	1209	30.8337	26.4689	48.6247	55.537	49.2897	49.2897	49.2897	49.2897	34.848	49.2897	60.6375	25.9144	25.9144	25.9144	25.9144	8.75063	25.9144	53.9167
Larus dominicanus	Laridae	seabird, oceanic	flap	890	1410	2280	38.2934	17.2584	45.0544	53.6923	41.0339	41.0339	41.0339	41.0339	37.6889	41.0339	72.8264	9.7438	9.7438	9.7438	9.7438	7.50355	9.7438	64.676
Larus fuscus	Laridae	seabird, also inland	NA	770	1425	2430	31.0852	15.207	42.9831	51.6131	42.0012	42.0012	42.0012	42.0012	34.4206	42.0012	70.7767	12.1011	12.1011	12.1011	12.1011	6.86589	12.1011	62.8208
Larus heermanni	Laridae	seabird, oceanic	flap	469	1135	1308	35.175	10.184	41.7296	51.5128	37.5123	44.6364	44.6364	44.6364	37.5123	37.5123	59.8205	6.77853	11.1171	11.1171	11.1171	6.77853	6.77853	42.9815
Larus marinus	Laridae	seabird, oceanic	flap	1560	1690	3170	48.2763	14.4732	42.5873	51.3157	40.5716	40.5716	40.5716	40.5716	29.767	40.5716	69.7942	9.57906	9.57906	9.57906	9.57906	6.86551	9.57906	57.0114
Larus minutus	Laridae	seabird, also inland	NA	88-162	620-780	NA	13.2435	39.854	60.305	66.715	61.1999	61.1999	61.1999	61.1999	54.9601	61.1999	54.9601	38.2699	38.2699	38.2699	38.2699	49.3145	38.2699	49.3145
Larus occidentalis	Laridae	seabird, oceanic	flap	1037	1436	2235	45.5166	17.2782	43.4049	51.5288	45.0491	45.0491	45.0491	45.0491	35.609	45.0491	47.9099	16.8038	16.8038	16.8038	16.8038	7.07384	16.8038	40.9776
Larus pipixcan	Laridae	seabird, also inland	flap	255	1015	945	26.4714	18.8941	47.0233	55.7684	47.3475	47.3475	47.3475	47.3475	37.1826	47.3475	63.2487	18.6452	18.6452	18.6452	18.6452	8.08485	18.6452	54.7169
Larus ridibundus	Laridae	seabird, also inland	NA	280	1050	946	29.0359	35.4494	53.8163	59.5742	58.6747	53.9196	53.9196	53.9196	37.4803	58.6747	53.9196	53.0542	32.1687	32.1687	32.1687	9.45432	53.0542	32.1687
Macronectes giganteus	Procellariidae	seabird, oceanic	flap-glide	4549	1980	2748	162.393	9.90893	42.9606	53.2291	42.9606	42.9606	42.9606	42.9606	42.9606	42.9606	42.9606	9.90893	9.90893	9.90893	9.90893	9.90893	9.90893	9.90893
Macronectes halli	Procellariidae	seabird, oceanic	flap-glide	4255	1980	2846	146.667	8.28623	42.8185	53.5419	42.8185	42.8185	42.8185	42.8185	42.8185	42.8185	42.8185	8.28623	8.28623	8.28623	8.28623	8.28623	8.28623	8.28623
Morus bassanus	Sulidae	seabird, oceanic	glide-flap	3010	1850	2620	112.703	41.6475	60.2484	66.0606	35.8158	72.6472	72.6472	72.6472	35.8158	35.8158	72.6472	6.97959	59.2405	59.2405	59.2405	6.97959	6.97959	59.2405
Oceanites oceanicus	Hydrobatidae	seabird, oceanic	glide-flap	38	393	219	17.0219	7.60672	31.3162	38.6611	34.3011	34.3011	34.3011	34.3011	29.7916	29.7916	29.7916	7.47754	7.47754	7.47754	7.47754	7.6727	7.6727	7.6727
Oceanodroma homochroa	Hydrobatidae		glide-flap	38	NA	193	19.315	8.6412	32.3433	39.6793	28.2263	28.2263	28.2263	28.2263	33.8403	33.8403	33.8403	5.09816	5.09816	5.09816	5.09816	9.92941	9.92941	9.92941
Oceanodroma leucorhoa	Hydrobatidae	seabird, oceanic	glide-flap	41	469	286	14.0633	9.75149	34.1298	41.6786	33.589	35.0868	35.0868	35.0868	33.589	33.589	33.589	10.038	9.24448	9.24448	9.24448	10.038	10.038	10.038
Oceanodroma melania	Hydrobatidae		glide-flap	59	NA	265	21.8411	6.16208	30.0611	37.4653	29.6982	30.6555	30.6555	30.6555	29.6982	29.6982	29.6982	6.46664	5.66327	5.66327	5.66327	6.46664	6.46664	6.46664
Pachyptila belcheri	Procellariidae	seabird, oceanic	flap-glide	150	592	411	35.8029	14.603	38.2154	45.5699	25.7476	42.8706	42.8706	25.7476	25.7476	25.7476	42.8706	6.92513	18.2886	18.2886	6.92513	6.92513	6.92513	18.2886
Pachyptila desolata	Procellariidae	seabird, oceanic	flap-glide	155	635	469	32.4211	12.0886	39.2782	47.7353	35.2752	42.8516	42.8516	35.2752	35.2752	35.2752	42.8516	8.0866	14.9252	14.9252	8.0866	8.0866	8.0866	14.9252
Pachyptila salvini	Procellariidae	seabird, oceanic	flap-glide	156	630	404	37.8802	16.1728	38.4962	45.4513	34.7819	40.867	40.867	34.7819	34.7819	34.7819	40.867	8.98147	21.319	21.319	8.98147	8.98147	8.98147	21.319
Pachyptila turtur	Procellariidae	seabird, oceanic	flap-glide	168	626	460	35.8278	15.2173	35.611	41.9743	35.1575	36.6757	36.6757	35.1575	35.1575	35.1575	36.6757	11.9452	18.4771	18.4771	11.9452	11.9452	11.9452	18.4771
Pachyptila vittata	Procellariidae	seabird, oceanic	flap-glide	168	621	467	35.2908	14.5884	36.1427	42.8493	33.6625	38.9077	38.9077	33.6625	33.6625	33.6625	38.9077	13.3464	17.0733	17.0733	13.3464	13.3464	13.3464	17.0733
Pagodroma nivea	Procellariidae	seabird, oceanic	flap-glide	329	826	711	45.3937	45.3906	59.2412	63.5867	59.2412	59.2412	59.2412	59.2412	59.2412	59.2412	59.2412	45.3906	45.3906	45.3906	45.3906	45.3906	45.3906	45.3906
Pelagodroma marina	Hydrobatidae	seabird, oceanic	glide-flap	41	434	266	15.1207	12.7666	40.3125	48.861	36.2477	43.2287	45.9138	45.9138	36.2477	36.2477	36.2477	9.66789	17.0365	17.0365	17.0365	9.66789	9.66789	9.66789
Pelecanoides urinatrix	Pelecanoididae	seabird, oceanic	glide-flap	150	425	221	66.5837	6.55275	40.3826	50.8714	40.3826	40.3826	40.3826	40.3826	40.3826	40.3826	40.3826	6.55275	6.55275	6.55275	6.55275	6.55275	6.55275	6.55275
Pelecanus occidentalis	Pelecanidae	seabird, oceanic	glide-flap	4120	2224	4920	82.1488	23.348	45.3896	52.2566	59.7795	59.7795	59.7795	59.7795	23.3665	23.3665	23.3665	36.0409	36.0409	36.0409	36.0409	3.92192	3.92192	3.92192
Pelecanus onocrotalus	Pelecanidae	seabird, also inland	glide-flap	10000	3150	10196	96.2142	37.1207	53.3059	58.3893	65.565	65.565	65.565	65.565	33.145	33.145	33.145	55.2887	55.2887	55.2887	55.2887	7.24192	7.24192	7.24192
Phaethon lepturus	Phaethontidae	seabird, oceanic	glide-flap	370	923	847	42.8536	43.3099	59.978	65.1953	69.2116	69.2116	69.2116	35.9583	35.9583	69.2116	69.2116	57.4977	57.4977	57.4977	6.40235	6.40235	57.4977	57.4977
Phaethon rubricauda	Phaethontidae	seabird, oceanic	glide-flap	765	1133	1228	61.1128	52.6688	68.255	73.1265	68.255	68.255	68.255	68.255	black	68.255	68.255	52.6688	52.6688	52.6688	52.6688	black	52.6688	52.6688
Phalacrocorax aristotelis	Phalacrocoracidae	seabird, oceanic	flap	1810	1040	1580	112.38	10.8877	47.0889	58.3215	47.0889	47.0889	47.0889	47.0889	47.0889	47.0889	47.0889	10.8877	10.8877	10.8877	10.8877	10.8877	10.8877	10.8877
Phalacrocorax atriceps	Phalacrocoracidae	seabird, oceanic	flap	2230	1130	1830	119.543	7.60067	40.7639	51.0479	40.5404	40.5404	51.6736	40.5404	40.5404	40.5404	40.5404	7.05079	7.05079	34.45	7.05079	7.05079	7.05079	7.05079
Phalacrocorax auritus	Phalacrocoracidae	seabird, also inland	flap	1410	1160	1790	7.67263	5.64999	35.0364	44.1605	35.0364	35.0364	35.0364	35.0364	35.0364	35.0364	35.0364	5.64999	5.64999	5.64999	5.64999	5.64999	5.64999	5.64999
Phalacrocorax carbo	Phalacrocoracidae	seabird, also inland	NA	3000	1450	2494	118.003	6.05105	40.0667	50.6234	40.0667	40.0667	40.0667	40.0667	40.0667	40.0667	40.0667	6.05105	6.05105	6.05105	6.05105	6.05105	6.05105	6.05105
Phalacrocorax pelagicus	Phalacrocoracidae	seabird, oceanic	flap	1156	954	1450	78.2094	6.68294	38.186	47.9651	38.186	38.186	38.186	38.186	38.186	38.186	38.186	6.68294	6.68294	6.68294	6.68294	6.68294	6.68294	6.68294
Phalacrocorax penicillatus	Phalacrocoracidae	seabird, oceanic	flap	1869	1083	1865	98.3104	7.35192	41.1255	51.5979	41.1255	41.1255	41.1255	41.1255	41.1255	41.1255	41.1255	7.35192	7.35192	7.35192	7.35192	7.35192	7.35192	7.35192
Phalaropus fulicarius	Scolopacidae	seabird, oceanic	flap	39	424	228	16.7803	13.8753	40.8026	49.1503	37.4036	37.4036	56.6884	56.6884	37.4036	37.4036	37.4036	7.80964	7.80964	42.2249	42.2249	7.80964	7.80964	7.80964
Phalaropus lobatus	Scolopacidae	seabird, oceanic	flap	37	352	195	18.6138	11.3765	43.369	53.2793	42.77	42.77	48.1208	48.1208	42.77	42.77	42.77	8.82939	8.82939	31.5814	31.5814	8.82939	8.82939	8.82939
Phoebastria albatrus	Diomedeidae	seabird, oceanic	glide	5100-7500	2130-2400	3406	216.016	15.1071	42.8759	51.5089	41.588	46.774	46.774	41.588	41.588	41.588	41.588	10.0511	30.4106	30.4106	10.0511	10.0511	10.0511	10.0511
Phoebastria nigripes	Diomedeidae	seabird, oceanic	glide	3980	2265	3607	108.245	5.48442	37.5947	47.5659	37.5947	37.5947	37.5947	37.5947	37.5947	37.5947	37.5947	5.48442	5.48442	5.48442	5.48442	5.48442	5.48442	5.48442
Phoebetria palpebrata	Diomedeidae	seabird, oceanic	glide	2840	2180	3380	82.4272	8.74232	40.014	49.7264	40.014	40.014	40.014	40.014	40.014	40.014	40.014	8.74232	8.74232	8.74232	8.74232	8.74232	8.74232	8.74232
Procellaria aequinoctialis	Procellariidae	seabird, oceanic	flap-glide	1370	1400	1690	79.5249	7.29344	33.0115	40.9823	33.0115	33.0115	33.0115	33.0115	33.0115	33.0115	33.0115	7.29344	7.29344	7.29344	7.29344	7.29344	7.29344	7.29344
Procellaria cinerea	Procellariidae	seabird, oceanic	flap-glide	1018	1190	1072	93.1584	12.7611	39.4579	47.745	39.4579	39.4579	39.4579	39.4579	39.4579	39.4579	39.4579	12.7611	12.7611	12.7611	12.7611	12.7611	12.7611	12.7611
Pterodroma externa	Procellariidae	seabird, oceanic	glide	421	1067	1041	40	8.03345	29.5817	36.253	29.5817	29.5817	29.5817	29.5817	29.5817	29.5817	29.5817	8.03345	8.03345	8.03345	8.03345	8.03345	8.03345	8.03345
Pterodroma hypoleuca	Procellariidae	seabird, oceanic	flap-glide	172	766	551	30.6229	7.56571	30.6416	37.7862	31.0493	31.0831	31.0831	31.0493	31.0493	31.0493	31.0831	7.47956	11.0165	11.0165	7.47956	7.47956	7.47956	11.0165
Pterodroma incerta	Procellariidae	seabird, oceanic	glide	358	842	633	55.4815	6.49005	31.837	39.6991	31.837	31.837	31.837	31.837	31.837	31.837	31.837	6.49005	6.49005	6.49005	6.49005	6.49005	6.49005	6.49005
Pterodroma inexpectata	Procellariidae	seabird, oceanic	glide	329	840	542	59.5478	13.3489	35.381	42.2265	34.0895	39.9263	39.9263	34.0895	34.0895	34.0895	39.9263	12.25	17.6166	17.6166	12.25	12.25	12.25	17.6166
Pterodroma lessonii	Procellariidae	seabird, oceanic	glide	586	1010	815	70.5357	9.91289	35.7379	43.7425	36.2364	38.6777	38.6777	36.2364	36.2364	36.2364	38.6777	10.0777	15.9674	15.9674	10.0777	10.0777	10.0777	15.9674
Pterodroma nigripennis	Procellariidae	seabird, oceanic	flap-glide	151	756	559	26.4993	6.62641	30.4289	37.807	30.4289	30.4289	30.4289	30.4289	30.4289	30.4289	30.4289	6.62641	6.62641	6.62641	6.62641	6.62641	6.62641	6.62641
Ptychoramphus aleuticus	Alcidae	seabird, oceanic	flap	190	441	262	71.1412	9.20596	32.8033	40.1372	32.8033	32.8033	32.8033	32.8033	32.8033	32.8033	32.8033	9.20596	9.20596	9.20596	9.20596	9.20596	9.20596	9.20596
Puffinus assimilis	Procellariidae	seabird, oceanic	glide-flap	238.11	600	383	60.9603	5.90672	30.9059	38.6566	30.9059	30.9059	30.9059	30.9059	30.9059	30.9059	30.9059	5.90672	5.90672	5.90672	5.90672	5.90672	5.90672	5.90672
Puffinus bulleri	Procellariidae	seabird, oceanic	flap-glide	397	997	1036	37.5924	8.07601	36.1767	44.8916	35.6149	37.6779	37.6779	35.6149	35.6149	35.6149	37.6779	7.75761	8.92691	8.92691	7.75761	7.75761	7.75761	8.92691
Puffinus griseus	Procellariidae	seabird, oceanic	glide-flap	799	1026	893	87.7737	7.10987	34.863	43.4708	34.863	34.863	34.863	34.863	34.863	34.863	34.863	7.10987	7.10987	7.10987	7.10987	7.10987	7.10987	7.10987
Puffinus huttoni	Procellariidae	seabird, oceanic	NA	364	740	487	73.3232	5.01792	25.2001	31.4553	25.2001	25.2001	25.2001	25.2001	25.2001	25.2001	25.2001	5.01792	5.01792	5.01792	5.01792	5.01792	5.01792	5.01792
Puffinus nativitatis	Procellariidae	seabird, oceanic	glide-flap	335	831	694	47.3537	6.21692	35.6477	44.7749	35.6477	35.6477	35.6477	35.6477	35.6477	35.6477	35.6477	6.21692	6.21692	6.21692	6.21692	6.21692	6.21692	6.21692
Puffinus pacificus	Procellariidae	seabird, oceanic	flap-glide	385	1040	1051	35.9358	7.98703	33.7637	41.7491	33.7637	33.7637	33.7637	33.7637	33.7637	33.7637	33.7637	7.98703	7.98703	7.98703	7.98703	7.98703	7.98703	7.98703
Puffinus puffinus	Procellariidae	seabird, oceanic	glide-flap	426	780	559	74.7596	6.91959	36.4906	45.6569	36.4906	36.4906	36.4906	36.4906	36.4906	36.4906	36.4906	6.91959	6.91959	6.91959	6.91959	6.91959	6.91959	6.91959
Puffinus tenuirostris	Procellariidae	seabird, oceanic	glide-flap	544	940	730	73.1047	5.11141	33.9979	42.9523	33.9979	33.9979	33.9979	33.9979	33.9979	33.9979	33.9979	5.11141	5.11141	5.11141	5.11141	5.11141	5.11141	5.11141
Rissa tridactyla	Laridae	seabird, oceanic	flap	368	1038	1015	35.5673	32.1509	56.1526	63.6366	58.3031	58.3031	58.3031	58.3031	31.48	58.3031	65.3443	33.7259	33.7259	33.7259	33.7259	6.82306	33.7259	55.8358
Rynchops niger	Laridae	seabird, also inland	NA	300	990	888	33.1419	15.2639	47.1073	56.9784	42.4273	42.4273	42.4273	42.4273	42.4273	42.4273	79.4617	8.22825	8.22825	8.22825	8.22825	8.22825	8.22825	63.9037
Stercorarius longicaudus	Stercorariidae	seabird, oceanic	flap	275	956	880	30.6563	5.88031	31.2831	39.1528	29.4848	33.5295	33.5295	33.5295	29.4848	29.4848	29.4848	5.66785	6.14571	6.14571	6.14571	5.66785	5.66785	5.66785
Stercorarius parasiticus	Stercorariidae	seabird, oceanic	flap	367	1038	1115	313.067	7.69018	31.9055	39.4102	40.4267	55.0027	55.0027	55.0027	40.4267	40.4267	40.4267	5.02942	10.3976	10.3976	10.3976	5.02942	5.02942	5.02942
Stercorarius pomarinus	Stercorariidae	seabird, oceanic	flap	654	1176	1533	419.329	7.67589	34.7379	43.129	34.7379	36.4197	36.4197	36.4197	34.7379	34.7379	34.7379	7.67589	7.67589	7.67589	7.67589	7.67589	7.67589	7.67589
Sterna forsteri	Laridae	seabird, also inland	flap	141	782	589	23.484	37.6696	60.27	67.3346	60.27	60.27	60.27	60.27	60.27	60.27	60.27	37.6696	37.6696	37.6696	37.6696	37.6696	37.6696	37.6696
Sterna fuscata	Laridae	seabird, oceanic	flap	176	840	712	24.2494	8.28348	38.3049	47.6088	38.3049	38.3049	38.3049	38.3049	38.3049	38.3049	38.3049	8.28348	8.28348	8.28348	8.28348	8.28348	8.28348	8.28348
Sterna maxima	Laridae	seabird, oceanic	NA	470	1150	1080	42.6917	34.9426	55.5596	45.3694	69.462	69.462	69.462	69.462	34.7748	69.462	69.462	49.5046	49.5046	49.5046	49.5046	13.1715	49.5046	49.5046
Sterna paradisaea	Laridae	seabird, oceanic	flap	103	733	495	20.4127	29.0169	54.5066	60.1358	55.0027	55.0027	55.0027	55.0027	40.4267	55.0027	55.0027	28.8037	28.8037	28.8037	28.8037	18.2202	28.8037	28.8037
Sula dactylatra	Sulidae	seabird, oceanic	glide-flap	1750	1563	2148	79.9232	21.1409	49.6989	58.5693	39.5385	73.0754	39.5385	39.5385	39.5385	39.5385	39.5385	6.67476	54.4237	6.67476	6.67476	6.67476	6.67476	6.67476
Sula leucogaster	Sulidae	seabird, oceanic	glide-flap	1348	1475	1995	66.2851	9.56371	42.5424	52.7614	42.5424	42.5424	42.5424	42.5424	42.5424	42.5424	42.5424	9.56371	9.56371	9.56371	9.56371	9.56371	9.56371	9.56371
Synthliboramphus antiquus	Alcidae	seabird, oceanic	flap	215	446	244	86.4406	15.4138	46.2594	55.819	46.2594	46.2594	46.2594	46.2594	46.2594	46.2594	46.2594	15.4138	15.4138	15.4138	15.4138	15.4138	15.4138	15.4138
Synthliboramphus hypoleucus	Alcidae	seabird, oceanic	flap	200	421	207	94.7826	13.5011	50.9742	62.587	50.9742	50.9742	50.9742	50.9742	50.9742	50.9742	50.9742	13.5011	13.5011	13.5011	13.5011	13.5011	13.5011	13.5011
Thalassarche chlororhynchos	Diomedeidae		glide	2068	NA	2507	80.9217	3.44449	31.901	40.7375	31.901	31.901	31.901	31.901	31.901	31.901	31.901	3.44449	3.44449	3.44449	3.44449	3.44449	3.44449	3.44449
Thalassarche chrysostoma	Diomedeidae	seabird, oceanic	glide	3790	2180	3520	105.625	4.52208	32.4018	41.0571	32.4018	32.4018	32.4018	32.4018	32.4018	32.4018	32.4018	4.52208	4.52208	4.52208	4.52208	4.52208	4.52208	4.52208
Thalassarche melanophrys	Diomedeidae	seabird, oceanic	glide	3790	2160	3560	104.438	3.67081	32.0022	40.8022	32.0022	32.0022	32.0022	32.0022	32.0022	32.0022	32.0022	3.67081	3.67081	3.67081	3.67081	3.67081	3.67081	3.67081
Thalassoica antarctica	Procellariidae	seabird, oceanic	glide-flap	733	1035	963	74.6701	30.7581	51.8518	58.4213	45.4938	45.4938	59.0824	59.0824	45.4938	45.4938	44.4434	13.5444	13.5444	48.2756	48.2756	13.5444	13.5444	15.0119
Uria aalge	Alcidae	seabird, oceanic	flap	1050	730	560	183.938	9.25415	46.5122	58.057	47.3559	47.3559	47.3559	47.3559	47.3559	47.3559	white	9.42202	9.42202	9.42202	9.42202	9.42202	9.42202	white
Uria lomvia	Alcidae	seabird, oceanic	flap	1033	727	560	180.959	10.8148	48.4228	NA	49.3246	49.3246	49.3246	49.3246	49.3246	49.3246	49.3246	11.0162	11.0162	11.0162	11.0162	11.0162	11.0162	white
